# Supplementary material
Source: MDPI journal article supplement (https://www.mdpi.com/2079-6447/3/2/7)
Supplement: s1 [file s1]

## Table of Contents

|                                                                 |    |
|-----------------------------------------------------------------|----|
| Spectroscopic characterization of <b>4a</b> and <b>4b</b> ..... | 02 |
| FTIR spectra of starches.....                                   | 05 |

## Spectroscopic characterization

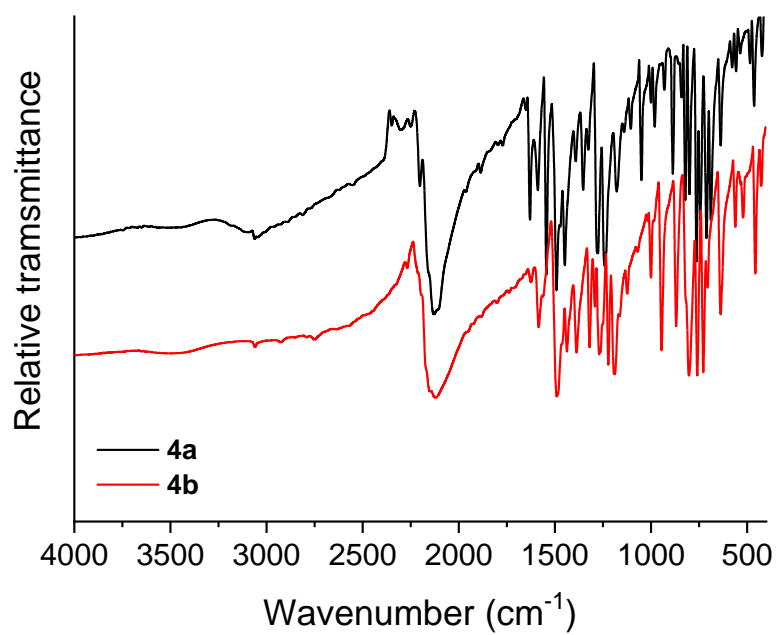

**Figure S1.** FTIR spectra of fluorophores **4a** and **4b**.

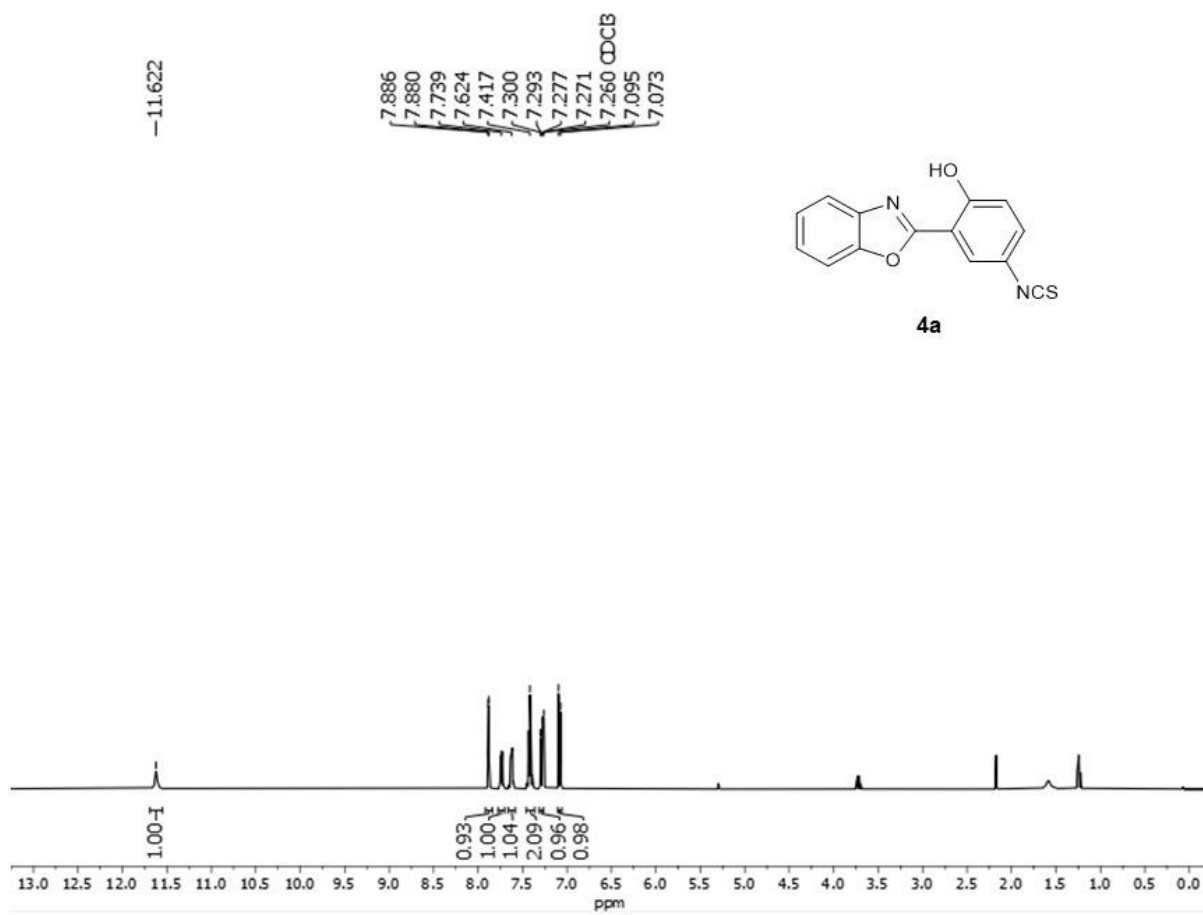

**Figure S2.** <sup>1</sup>H NMR spectrum (CDCl<sub>3</sub>, 400 MHz) of fluorophore **4a**.

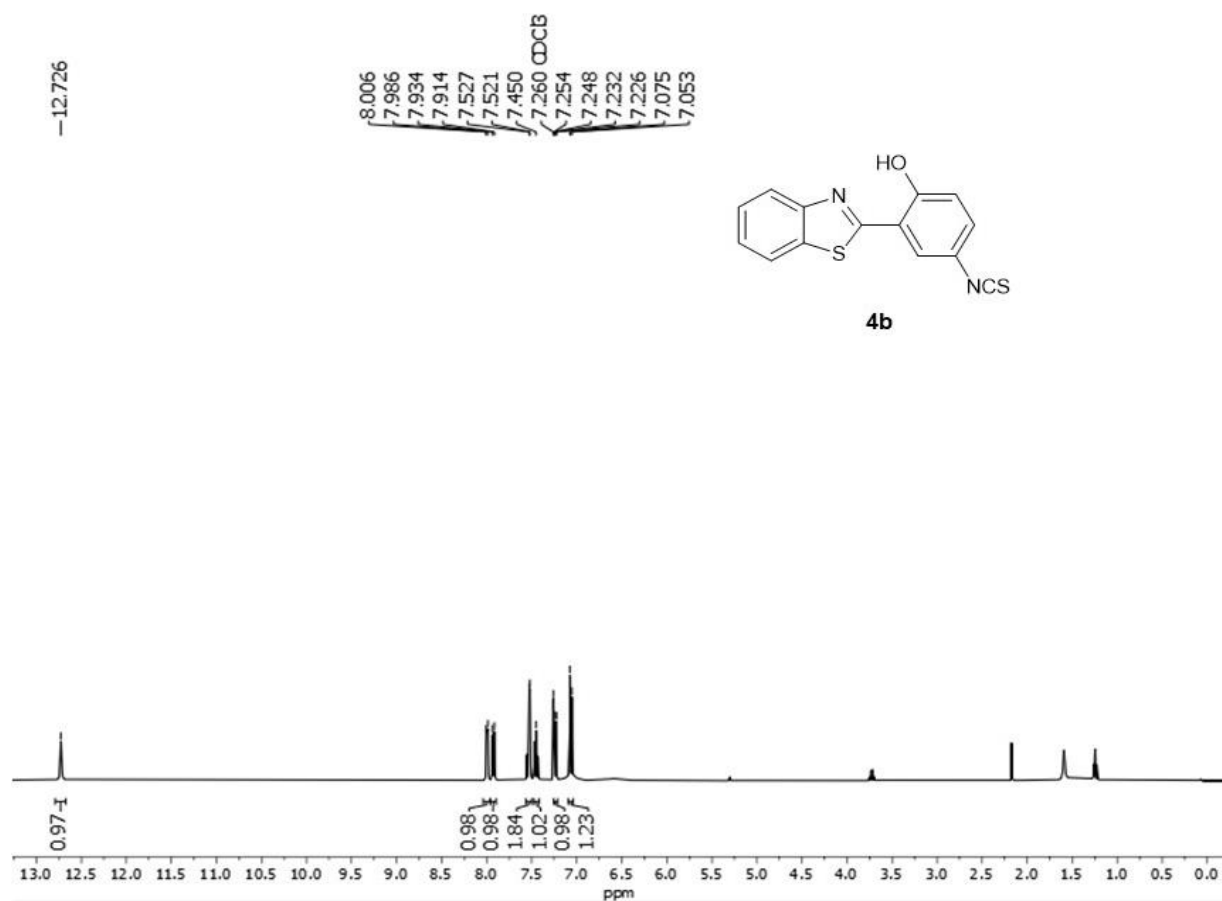

**Figure S3.** <sup>1</sup>H NMR spectrum (CDCl<sub>3</sub>, 400 MHz) of fluorophore **4b**.

### FTIR spectra of starches

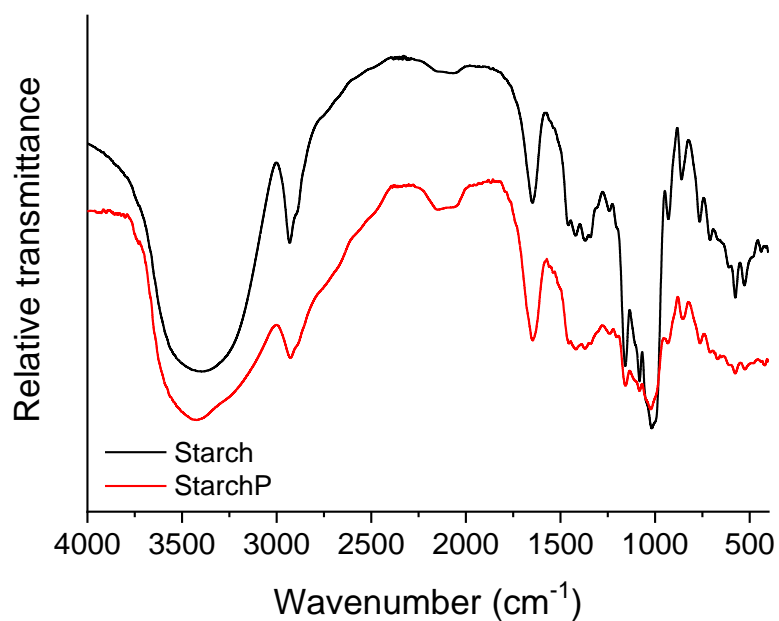

**Figure S4.** FTIR spectra of starch and processed starch (StarchP).

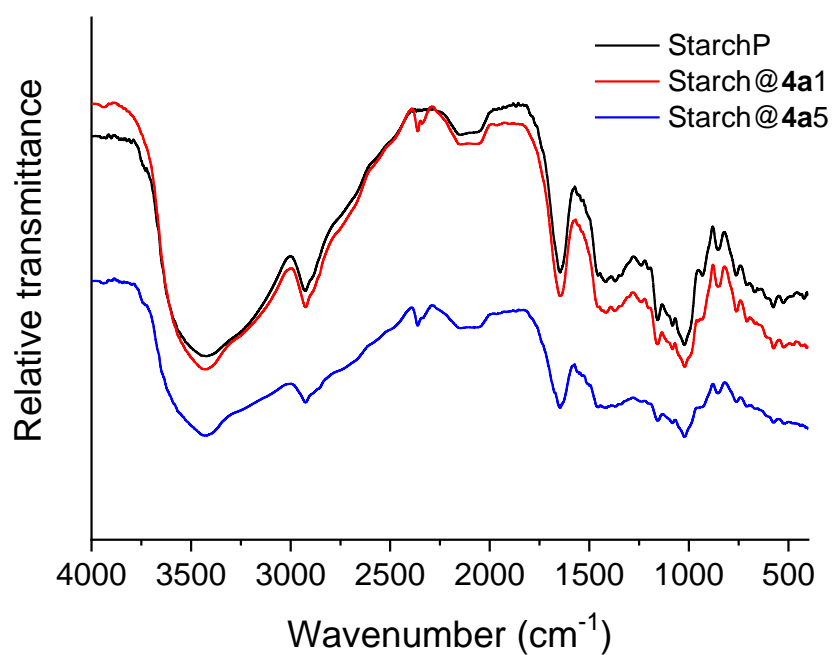

**Figure S5.** FTIR spectra of modified starches with fluorophore **4a**. StarchP spectrum was presented for comparison.

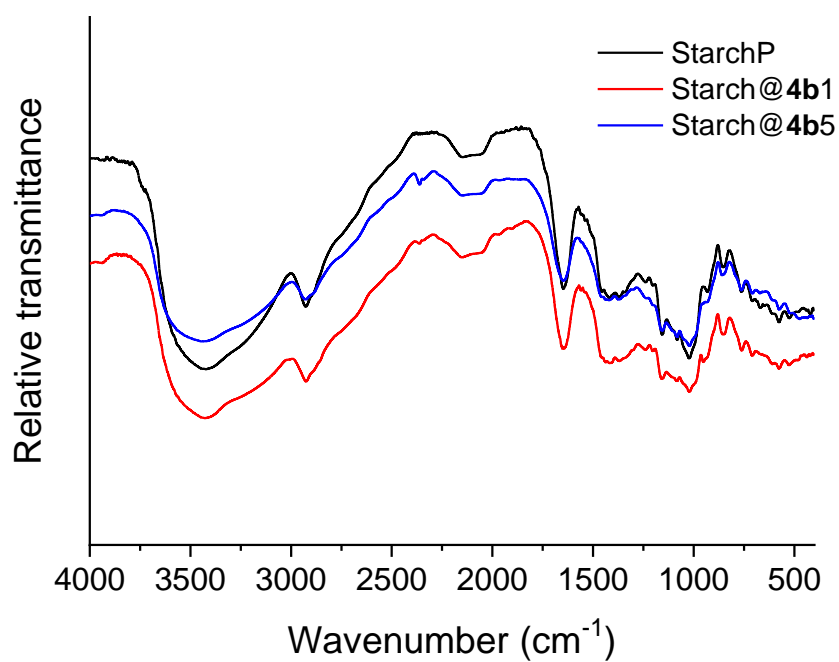

**Figure S6.** FTIR spectra of modified starches with fluorophore **4b**. StarchP spectrum was presented for comparison.
